# Supplementary material
Source: MDPI journal article supplement (https://www.mdpi.com/2075-163X/11/12/1382)
Supplement: s1 [file s1]

# Supplementary data

**Table S1.** Mg, Mn, Fe and Sr contents in ppm of the karst fills and host carbonates in the Casablanca and Amposta oil wells and in the Penedès Basin.

| Studied area                      | Description                 |     | Mg (ppm) | Mn (ppm) | Fe (ppm) | Sr (ppm) | n  |
|-----------------------------------|-----------------------------|-----|----------|----------|----------|----------|----|
| <b>Casablanca-1A oil well</b>     |                             |     |          |          |          |          |    |
|                                   |                             | Max | 122215   | d.l.     | 2950     | 479      |    |
|                                   | Dolomite 1                  | Min | 118742   | d.l.     | 2514     | 397      | 3  |
|                                   |                             | Med | 120659   | -        | 2701     | 452      |    |
|                                   |                             | Max | 128604   | d.l.     | 8341     | 677      |    |
|                                   | Dolomite 2a                 | Min | 118800   | d.l.     | d.l.     | d.l.     | 30 |
|                                   |                             | Med | 124515   | -        | d.l.     | 419      |    |
|                                   |                             | Max | 122661   | d.l.     | 7051     | 672      |    |
|                                   | Dolomite 2b                 | Min | 119000   | d.l.     | 1959     | d.l.     | 34 |
|                                   |                             | Med | 122545   | -        | 3496     | 416      |    |
| <b>Amposta Marino C2 oil well</b> |                             |     |          |          |          |          |    |
|                                   |                             | Max | 1013     | d.l.     | 1813     | 355      |    |
|                                   | Lower Cretaceous limestones | Min | 4909     | d.l.     | d.l.     | 1407     | 15 |
|                                   |                             | Med | 3081     | -        | 821      | 908      |    |
|                                   |                             | Max | 2619     | d.l.     | 721      | 640      |    |
|                                   | CS3r                        | Min | 4038     | d.l.     | d.l.     | 1053     | 9  |
|                                   |                             | Med | 3426     | -        | 531      | 863      |    |
|                                   |                             | Max | 1052     | d.l.     | 2701     | 491      |    |
|                                   | CS3g                        | Min | 5461     | d.l.     | d.l.     | 1259     | 9  |
|                                   |                             | Med | 3692     | -        | 1521     | 866      |    |
| <b>Penedès Basin</b>              |                             |     |          |          |          |          |    |
| <b>Castellví</b>                  |                             |     |          |          |          |          |    |
|                                   |                             | Max | 130202   | d.l.     | 1191     | 316      |    |
|                                   | RD1                         | Min | 125280   | d.l.     | 219      | 129      | 4  |
|                                   |                             | Med | 127371   | -        | 543      | 206      |    |
|                                   |                             | Max | 120843   | 235      | 6927     | 1250     |    |
|                                   | DS2                         | Min | 105966   | d.l.     | 52       | 177      | 54 |
|                                   |                             | Med | 113550   | 169      | 1186     | 748      |    |
|                                   |                             | Max | 120083   | 346      | 2866     | 1228     |    |
|                                   | DS3                         | Min | 107265   | 115      | 213      | 237      | 32 |
|                                   |                             | Med | 114518   | 183      | 1002     | 740      |    |
|                                   |                             | Max | 3620     | 128      | 2885     | 686      |    |
|                                   | CS1                         | Min | 1915     | d.l.     | 212      | 292      | 8  |
|                                   |                             | Med | 2831     | -        | 972      | 440      |    |
| <b>Olèrdola</b>                   |                             |     |          |          |          |          |    |
|                                   | Host limestones             | Max | 5103     | 478      | 1253     | d.l.     |    |
|                                   |                             | Min | 231      | 191      | 578      | d.l.     | 42 |
|                                   |                             | Med | 2738     | 231      | 851      | -        |    |
|                                   | CS2                         | Max | 1672     | 287      | 916      | d.l.     |    |
|                                   |                             | Min | 923      | 239      | 530      | d.l.     | 7  |
|                                   |                             | Med | 1396     | 307      | 771      | -        |    |
|                                   | CS3                         | Max | 3200     | 478      | 1784     | d.l.     |    |
|                                   |                             | Min | 2018     | 239      | 627      | d.l.     | 5  |
|                                   |                             | Med | 2808     | 325.2    | 1350     | -        |    |
| <b>Montjuïc</b>                   |                             |     |          |          |          |          |    |
|                                   |                             | Max | 2652     | 126      | 1127     | 444      |    |
|                                   | Host limestones             | Min | 2020     | 108      | 1078     | 430      | 2  |
|                                   |                             | Med | 2336     | 117      | 1102.5   | 437      |    |
|                                   |                             | Max | 1602     | d.l.     | 2056     | 297      |    |
|                                   | OP1                         | Min | 522      | d.l.     | 478      | 179      | 5  |
|                                   |                             | Med | 1271.2   | -        | 1176     | 222      |    |

**Table S2.**  $\delta^{18}\text{O}$  and  $\delta^{13}\text{C}$  values of the karst fills and host carbonates of the Casablanca and Amposta oil wells and of the Penedès Basin.

| Studied area                  | Sample    | Description                 | $\delta^{13}\text{C}$ PDB | $\delta^{18}\text{O}$ PDB |
|-------------------------------|-----------|-----------------------------|---------------------------|---------------------------|
| <b>Casablanca oil well</b>    |           |                             |                           |                           |
|                               | RM-20.1   | Dolomite 1                  | -8.8                      | +1.2                      |
|                               | RM-30.3   | Dolomite 1                  | -7.6                      | +1.7                      |
|                               | RM-30.4   | Dolomite 1                  | -9.7                      | +1.1                      |
|                               | RM-47.4   | Dolomite 1                  | -10.8                     | +1.2                      |
|                               | RM-12.2   | Dolomite 2a                 | -10.4                     | +1.1                      |
|                               | RM-13.2   | Dolomite 2a                 | -6.8                      | +1.9                      |
|                               | RM-16.2   | Dolomite 2a                 | -9.8                      | +1.0                      |
|                               | RM-32.3   | Dolomite 2a                 | -8.9                      | +1.2                      |
|                               | RM-24.3   | Dolomite 2a                 | -9.4                      | +2.0                      |
|                               | RM-30.2   | Dolomite 2a                 | -10.3                     | +1.0                      |
|                               | RM-29.4   | Dolomite 2a                 | -6.9                      | +2.4                      |
|                               | RM-47.3   | Dolomite 2a                 | -9.3                      | +1.1                      |
|                               | RM-12.1   | Dolomite 2b                 | -6.1                      | +1.3                      |
|                               | RM-12.4   | Dolomite 2b                 | -6.3                      | +1.3                      |
|                               | RM-13.1   | Dolomite 2b                 | -7.73                     | +1.1                      |
|                               | RM-32.1   | Dolomite 2b                 | -6.8                      | +1.1                      |
|                               | RM-32.2   | Dolomite 2b                 | -6.8                      | +1.1                      |
|                               | RM-31.1   | Dolomite 2b                 | -6.5                      | +1.0                      |
|                               | RM-19.4   | Dolomite 2b                 | -2.3                      | +1.4                      |
|                               | RM-16.1   | Dolomite 2b                 | -8.3                      | +1.2                      |
|                               | RM-16.5   | Dolomite 2b                 | -8.3                      | +1.2                      |
|                               | RM-17.2   | Dolomite 2b                 | -9.3                      | +1.1                      |
|                               | RM-17.6   | Dolomite 2b                 | -9.6                      | +1.1                      |
|                               | RM-47.1   | Dolomite 2b                 | -7                        | +1.1                      |
|                               | RM-47.2   | Dolomite 2b                 | -7.2                      | +1.1                      |
|                               | RM-46.1   | Dolomite 2b                 | -7.4                      | +1.2                      |
|                               | RM-30.5   | Dolomite 2b                 | -9.1                      | +0.9                      |
| <b>Amposta Marino C2 well</b> |           |                             |                           |                           |
|                               | 6d        | Lower Cretaceous limestones | -2.2                      | +1.1                      |
|                               | 6e        | Lower Cretaceous limestones | -2.3                      | +1.1                      |
|                               | 14c       | Lower Cretaceous limestones | -3.9                      | +1.5                      |
|                               | 15g       | Lower Cretaceous limestones | -2.7                      | +1.4                      |
|                               | 18d       | Lower Cretaceous limestones | -4.2                      | +0.9                      |
|                               | 18e       | Lower Cretaceous limestones | -3.5                      | +1.2                      |
|                               | 19b       | Cs3r                        | -5.8                      | -0.40                     |
|                               | 19c       | Cs3r                        | -8.9                      | +0.3                      |
|                               | 8i        | Cs3g                        | -5.8                      | -0.1                      |
|                               | 8j        | Cs3g                        | -8.7                      | -0.6                      |
|                               | 12a       | Cs3g                        | -8.6                      | 0                         |
|                               | 15a       | Cs3g                        | -5.9                      | -1.2                      |
|                               | 15f       | Cs3g                        | -4.1                      | -0.6                      |
|                               | 15h       | Cs3g                        | -4.1                      | -0.3                      |
|                               | 16b       | Cs3g                        | -4.4                      | +0.5                      |
| <b>Penedès Basin</b>          |           |                             |                           |                           |
| Castellví                     | VCBJ-1c   | RD1                         | +0.7                      | +0.1                      |
|                               | VCBJ -2Ac | RD1                         | +2.3                      | +0.3                      |
|                               | VCBJ -2Bb | RD1                         | +2.1                      | +1.2                      |
|                               | VCBJ -6Ac | RD1                         | +1.5                      | +0.3                      |

|          |           |                 |      |      |
|----------|-----------|-----------------|------|------|
| Olèrdola | VCBJ -6Ad | RD1             | +1.8 | +0.9 |
|          | VCBJ -7a  | RD1             | +2.0 | +0.5 |
|          | VCBJ -8a  | RD1             | +1.7 | +0.8 |
|          | VCBJ -1d  | RD1             | +0.4 | -2.4 |
|          | VCBJ -1e  | RD1             | +2.1 | -1.8 |
|          | VCBJ -2Aa | RD1             | -0.1 | -0.9 |
|          | VCBJ -2Ab | RD1             | +1.2 | -0.4 |
|          | VCBJ -2Bc | RD1             | -0.5 | -1.8 |
|          | VCBJ -3Ac | RD1             | +1.0 | -1.6 |
|          | VCBJ -3Bd | RD1             | +1.0 | -1.8 |
|          | VCBJ -3Bf | RD1             | +0.5 | -2.2 |
|          | VCBJ -4d  | RD1             | +0.3 | -1.5 |
|          | VCBJ -5f  | RD1             | +1.1 | -1.8 |
|          | VCG 5b    | RD1             | +1.9 | -1.1 |
|          | VCG 7a    | RD1             | +0.8 | -1.6 |
|          | VCG 7b    | RD1             | +1.3 | -2.1 |
|          | VCG 10Ac  | RD1             | +1.3 | -1.7 |
|          | VCG 11c   | RD1             | +0.9 | -1.1 |
|          | VCV-19 Bb | DS2             | -3.8 | -1.6 |
|          | VCV-19 Cd | DS2             | -4.2 | -1.4 |
|          | VCV-20 Ae | DS2             | -3.0 | -0.8 |
|          | VCV-20 Af | DS2             | -3.2 | -0.9 |
|          | VCV-20 Be | DS2             | -3.8 | -1.1 |
|          | VCV-20 Ac | DS2             | -3.6 | -1.0 |
|          | VCV-8g    | DS2             | -3.7 | -1.1 |
|          | VCV-20 Bc | DS2             | -4.0 | -1.3 |
|          | VCV-20 Bd | DS2             | -3.6 | -1.2 |
|          | VCV-20 Ag | DS2             | -3.9 | -1.4 |
|          | VCV-17 Bb | DS3             | -1.9 | -0.1 |
|          | VCV-19 Bd | DS3             | -1.3 | +0.7 |
|          | VCV-19 Be | DS3             | -1.1 | +0.5 |
|          | VCV-20 Ab | DS3             | -2.0 | -2.0 |
|          | VCV-15 Ba | DS3             | -1.3 | -0.9 |
|          | VCV-5 Bc  | CS1             | -7.7 | -8.5 |
|          | VCV-5 Bd  | CS1             | -7.8 | -8.6 |
|          | VCV-6A-1  | CS1             | -7.6 | -8.6 |
| Montjuïc | KO 2c     | Host limestones | +1.2 | -4.9 |
|          | KO 3b     | Host limestones | +1.5 | -4.5 |
|          | KO 1c     | Host limestones | +0.4 | -5.4 |
|          | KO 2b     | CS2             | -4.7 | -6.3 |
|          | KO 1a     | CS2             | -4.4 | -5.9 |
|          | KO 2b     | CS3             | -3.6 | -3.8 |
|          | KO 3a     | CS3             | -3.2 | -4.2 |
|          | KO 1b     | CS3             | -4.1 | -3.8 |
|          | VMJ-6Bb   | Host limestones | -4.0 | -4.3 |
|          | VMJ-1c    | Host limestones | -5.3 | -5.3 |
|          | VMJ-3(D)  | Host limestones | -4.6 | -4.0 |
|          | VMJ-3A5   | Host limestones | -4.9 | -4.3 |
|          | VMJ-3B1   | Host limestones | -5.6 | -4.3 |
|          | VMJ-6Aa   | Host limestones | -5.4 | -3.3 |
|          | VMJ-6Ba   | Host limestones | -5.8 | -3.3 |
|          | VMJ-7Cc   | Host limestones | -4.7 | -3.0 |
|          | VMJ-14Ab  | OP1             | -9.0 | -4.7 |
|          | VMJ-11'-a | OP1             | -9.4 | -4.7 |
|          | VMJ-11Bb  | OP1             | -8.5 | -4.9 |
|          | VMJ-12Ac  | OP1             | -8.5 | -4.9 |

|          |     |       |      |
|----------|-----|-------|------|
| VMJ-14Ac | OP1 | -8.9  | -4.7 |
| VMJ-14Ba | OP1 | -9.5  | -4.5 |
| VMJ-17b  | OP1 | -9.1  | -4.4 |
| VMJ-17d  | OP1 | -10.3 | -7.1 |

**Table S3.**  $^{87}\text{Sr}/^{86}\text{Sr}$  ratios of the karst fills and host carbonates of the Casablanca and Amposta oil and of the Castellví outcrop in the Penedès Basin.

| Scheme 87.                    | Sample  | Description                 | $^{87}\text{Sr}/^{86}\text{Sr}$ |
|-------------------------------|---------|-----------------------------|---------------------------------|
| <b>Casablanca oil well</b>    |         |                             |                                 |
|                               | RM-32b  | Dolomite 2a                 | 0,708607                        |
|                               | RM-32a  | Dolomite 2b                 | 0,709202                        |
|                               | RM-47a  | Dolomite 2b                 | 0,709137                        |
| <b>Amposta Marino C2 well</b> |         |                             |                                 |
|                               | 6A      | Lower Cretaceous limestones | 0,707633                        |
|                               | 8B      | Lower Cretaceous limestones | 0,707524                        |
|                               | 18A     | Lower Cretaceous limestones | 0,707483                        |
|                               | 17B     | CS3r                        | 0,708699                        |
|                               | 19A     | CS3r                        | 0,708576                        |
|                               | 15A     | CS3g                        | 0,708615                        |
| <b>Penedès basin</b>          |         |                             |                                 |
| Castellví                     | VCBJ-14 | RD1                         | 0,707417                        |
|                               | VCV-X   | DS2                         | 0,708761                        |
|                               | VCV-20  | DS3                         | 0,708855                        |
